# Supplementary material for: SlMYB41 induced by exogenous brassinosteroids negatively regulates the cold resistance of tomato
Source: Research Square preprint supplement (doi:10.21203/rs.3.rs-3881985/v1), 2024-02-29
Supplement: Supplementary file 1 [file 74f4ede6b54f1522877a5134.docx]

**Table S2.** Primers used in this study.

| Gene | Forward primer (5’-3’) | Reverse primer (5’-3’) |
| --- | --- | --- |
| Solyc02g070940.1 for Q-PCR | ATGGGAGCCGTTGAAGGTTA | CAAGGTGGTCAGCAAGGTTC |
| Solyc01g111880.4 for Q-PCR | GTGGCAGTAGAGTGGTGGAT | CACATCCAATGCGTACCGAG |
| Solyc05g051200.1 for Q-PCR | AGGGGTCCTTGGTCTCTACT | ACTACTTCTCTTGTGCTTGACTC |
| Solyc12g087960.2 for Q-PCR | GCGGAAGGTTGATAGGGAGT | TTATCTTCCAAATCCGCGCG |
| Solyc03g064010.4 for Q-PCR | AGGAGGGGCAAAAGGGTAAA | CGCTTAATCGTCGAACAGCA |
| Solyc03g118970.3 for Q-PCR | TGCTTTCTGGCCTACTTCCA | ACACAAGCCCCTCCATAACA |
| Solyc05g026480.2 for Q-PCR | CCAAGTTCAGCGCCTTCTAC | AGCGCCTAGGGATTATGCTT |
| Solyc03g082370.1 for Q-PCR | AGTTCCTTTGATGCGCTTTCT | GAACCTCTGCCTCTTCTGCT |
| Solyc10g086500.1 for Q-PCR | ATACCGAGAGGTGGGCTTTT | ATTCGAAACAGCTCGAGGAA |
| Solyc11g013310.2 for Q-PCR | GAGGGAGTGAAGCACTCAGG | GCATCTCCAAAAGCCCAATA |
| Solyc07g042490.1 for Q-PCR | CCTTCAAAATTGGCCGAGTA | TCTTCAGTCTCACCGGACCT |
| Solyc12g044280.2 for Q-PCR | CCTAGCTGGAAGCTCCATTG | TATGGTGAGGGTGCATCTGA |
| Solyc12g044610.2 for Q-PCR | CACCTTCTGCAACAAAAGCA | TGGGAAGAATGCTGGAAATC |
| Solyc10g008270.3 for Q-PCR | GCTTCATTCCATGCTCCCTA | GCCCATTTTCAATTCTTCCA |
| Solyc07g051840.5 for Q-PCR | AATGTTGCTCTCGGGCTCTA | AAAGTGCAGCTGGATTTGCT |
| Solyc01g008510.3 for Q-PCR | AACCAGGAACGAAGGGTTTT | CCTTTGGTTCCTCAGCCATA |
| Solyc00g500209.1 for Q-PCR | TGCAGCGTTAATGCTTTTTG | TCCATGACCAATACCCCAGT |
| SlMYB41 for Q-PCR | CTGGAAATTGGCGAACACTT | CGTTGTCTGTTCTCCCTGGT |
| SlMYB41-Flag | CTGCAGATGGGAAGATCACCATGT | GGTACCCATAAAATCATCAAAATTTAAGC |
| SlCBF1 for Q-PCR | TTCATCGTCATCGTCGTTTTCT | TCCTCTTCCTGATTCCCCTGT |
| SlCBF3 for Q-PCR | TGCCGGGTTTACTTACGAAT | TCAGCTTCCACATGATCTCC |
| SlDRCi7 for Q-PCR | TTGTGTTTCTGTGTTGTTTTGG | GCACATACATATGCACTTACATACAG |
| SlICE1 for Q-PCR | GGAAGGAAAAGCGGTGAAC | AACACATCCAACACAAACCC |
| *UBI3* for Q-PCR | GTGTGGGCTCACCTACGTTT | ACAATCCCAAGGGTTGTCAC |
