# Supplementary material for: SlMYB41 induced by exogenous brassinosteroids negatively regulates the cold resistance of tomato
Source: Research Square preprint supplement (doi:10.21203/rs.3.rs-3881985/v1), 2024-02-29
Supplement: Supplementary file 2 [file a00ca6f26d3193351e01d634.xlsx]

## Sheet: Sheet1
	Supplementary Table S5. RNA-seq data were validated by qPCR experiments of information of 17 genes.
			MT-0d vs MT-1d		MT-0d vs MT-1d
		gene	qRT-PCR results	qRT-PCRlog2 FoldChange	RNA-Seq
	1	Solyc02g070940.1	0.31027	-1.6884	-1.84568
	2	Solyc01g111880.4	14.7246	3.88016	4.47971
	3	Solyc05g051200.1	3.68609	1.88209	1.98078
	4	Solyc12g087960.2	8.16869	3.0301	2.60599
	5	Solyc03g064010.4	0.218799	-2.19232	-1.5054
	6	Solyc03g118970.3	7.39637	2.88682	3.56944
	7	Solyc05g026480.2	0.229271	-2.12488	-2.01545
	8	Solyc03g082370.1	8.82396	3.14143	5.1146
	9	Solyc10g086500.1	0.327075	-1.61231	-3.22716
	10	Solyc11g013310.2	1.22838	0.296762	0.814
	11	Solyc07g042490.1	2.28922	1.19486	-1.25184
	12	Solyc12g044280.2	0.263162	-1.92598	-1.95
	13	Solyc12g044610.2	2.37974	1.2508	2.04904
	14	Solyc10g008270.3	0.322042	-1.63468	-2.62045
	15	Solyc07g051840.5	2.63966	1.40035	1.822
	16	Solyc01g008510.3	0.0726897	-3.7821	-5.1963
	17	Solyc00g500209.1	1.25292	0.325291	1.10637
