# Supplementary material for: SlMYB41 induced by exogenous brassinosteroids negatively regulates the cold resistance of tomato
Source: Research Square preprint supplement (doi:10.21203/rs.3.rs-3881985/v1), 2024-02-29
Supplement: Supplementary file 3 [file b409634f4798077e24d2b433.docx]

Table 1. Predominant cis-elements detected in the promoter of *SlMYB41*.

| Factor or site name | Signal sequence | site | Funcion |
| --- | --- | --- | --- |
| MYB | CAACCA | 17 (+);1264 (-) | MYB binding site |
| MYC | CATGTG | 362 (-);690 (-) | MYC binding site |
| ARE | AAACCA | 999 (-);1207 (+) | cis-acting regulatory element essential for the anaerobic induction |
| Box 4 | ATTAAT | 507 (+);1423 (-);627 (+);1567 (-);  603 (+);1518 (-);721 (+) | part of a conserved DNA module involved in light responsiveness |
| GA-motif | ATAGATAA | 563 (-) | part of a light responsive element |
| GATA-motif | GATAGGA | 214 (+) | part of a light responsive element |
| TC-rich repeats | GTTTTCTTAC | 573 (+);1624 (+) | cis-acting element involved in defense and stress responsiveness |
| ABRE | GACACGTGGC | 1043 (-) | cis-acting element involved in the abscisic acid responsiveness |
| TGA-element | AACGAC | 433 (+) | auxin-responsive element |
| TCA-element | CCATCTTTTT | 1129 (-);1531 (-) | cis-acting element involved in salicylic acid responsiveness |
| CGTCA-motif | CGTCA | 107 (-);814 (-);520(+) | cis-acting regulatory element involved in the MeJA-responsiveness |
| TGACG-motif | TGACG | 107 (+);814 (+);520(-) | cis-acting regulatory element involved in the MeJA-responsiveness |
