# Supplementary material for: SlMYB41 induced by exogenous brassinosteroids negatively regulates the cold resistance of tomato
Source: Research Square preprint supplement (doi:10.21203/rs.3.rs-3881985/v1), 2024-02-29
Supplement: Supplementary file 4 [file e997503ded310f9c8ec77ae8.docx]

*Solyc07g054840.4* CDS sequence 1002bp

ATGGGAAGATCACCATGTTGTGATAAAAATGGACTCAAAAAAGGTCCATGGACTCCAGAAGAAGATAATAAACTCATCCAGTATATTCAACTTCATGGTCCTGGAAATTGGCGAACACTTCCTAAGAATGCTGGACTTCAAAGGTGTGGAAAGAGTTGTCGTCTTCGTTGGACTAATTACTTGAGACCTGATATTAAAAGAGGAAGATTCTCATTTGATGAAGAAGAAACTATTATCCAACTTCATAGTGTTCTTGGCAACAAGTGGTCAGCTATAGCGGCTCGTCTACCAGGGAGAACAGACAACGAAATCAAGAATTATTGGAACACTCACATTAGAAAAAGGCTTCTAAGAAATGGTATTGATCCAGTGACTCATAGTCCTCGTCTTGATTTATTAGACTTATCGTCCCTTCTAAATTCGACCCAATTCAACCTATCGAGCTTACTTGGGCTACAAGCACTTATAAACCCTGAAGTCTTTAGTCTTGCAGCTACTCTTTTGGCATCACAAAATGAAATTACCCCAGAAGTGTTACTACAAAAATATCAAGAAAATAATCAAATGTTCAACTCTCAACTACAAAACCAAGAAGGGTCTGAATTGTTGTTACAAAAACTTCAACAAAATCAAATATTGAATTCCCAATTGCAAAATCAGACTCAATTTTTCCAATTCCAAAATCAAATTCAAGAAACACCAAATTTCACCACACAAAATGTTCCTTGTTCATCTTCATTGTCACGGCCAATGCAATTGGGACACGTGGAGGAATCTTATTTGATGAATGGCCAAATGCTACCTCCACAAAACTATGGTTATTGTAATTCTGATGCTTCTGATAATTCAAATTTCCAGTCACTCAACAACAACAGCAGCAATCAGAATATAAGCTTAGATTCAGTGTTATCGACACCCACGGAAGACGAAAAAGAGAGCTATTGCAGTAATTTGATGAAGTTCGAAATCCCAGAGAGCTTAAATTTTGATGATTTTATGTAA

The 3 kb sequence upstream of the *Solyc07g054840.4* (*SlMYB41*) start codon

AGTCTTGATGAATCTTACTTATGCAATAATCAATATGACTTGAAAAGGAAAACGTGTGTTGTGAAGCAAGTGAGATTTCAAAATTGATATTGGTGTATATGGCATATCCTCAATATTTTTCAATAACTAAAAATGTCCACGATGGGGGCCACCTGTAATCTGTGGTTATGATTTGTATAAGCAGCTGTTTTTTTTTAAAAAAAAAATAATCTGATTAATCAGCATCGGTACAGTACTGGGACCACATAAAAAGAGCAGATCAGTTTTTGGTCGAAATTTATATTATAAAAATATGATTTTTTTCAGTTTGTTTTCCTTATTGAATCGATTCATTAAAAAATATATCAACATCTAATATAAATTTTAATTGTTATTAATTTAATATAAAATATTTTTGTACGAGAAAATAGTGATTTTTTTATATTTATATGGGGACACTTGTCCCTAGGATACATGTACGGTTTGGATTGGCCTGACCTCAGGACACGTCCTCAAAATACAAATTAAATTAAGTTAGCGTCTTTTACGTAAACACTCCAATTTCATATTTCCTGTAAATTAAAATTACTCATAAAGTTCACTGTTTTTGTTGTTTAAAACCGACTAATGGAAATATGTTCCTTCTGAAAATTGTGCTTCCTAGCTAGTTTTGAATTAGTGTGGAATTAAAAATAATCTATAGCATATTACAATACCTTTATAAGATTATAAAACTTTCTCATTAGTTAGACGGAATAAAAGTATAAACTAATTATTTTCAGCTTTAAAAAGTGTATCATTATTTTATATAAACTTATTTGAAAATTAAAAGAGCAAAAAGGGGGTTTTGTCATTATTTTATATTTTTATGTAATACTGTATAACTTTTTCTACTAACATATGTATATAGCTTTCTTTTCCATTTTTCTGGGGTCTGTTATATACCCTTTTCTCTGTTAGTGATTTTATTCCTCAATATCATAGTTGACCTTTTTGCTCTCAAAATATTTTTTTCAATCCTTCTATTTTATATTTTACAACCATGAGATCTCCACATTTTGGACATTCTAAATTTCAAAATGAAATATATAAACTATAGAGGATACAAAAAAGAAATGCTTTCCCACTGACGATTAAGAAGAAATTTAGAAAATCATTAACTCGAATAGCAATATTGAATATTACATGCTTTATTAACAGATTATATGATGATTTCAATAAAGAATCGAGAAAAGATAGGATATACCTAGACTTCGTTCTTAGTTTTATGGATTAGAAAAGTTACTTTAATAAACTCTAATTTAAAATGATTTTTTAAAAAAAAAAATTGCATAAATAATACGATGACAAATTAGGAAGGTACAAAGCAAATACATCGGCAACACATGACAAAATACATCAAGAGACTATATATCCGAACACTAAATAATATTACTAATAAGGAGAGGAGGCTAACGACTAATCCCCTATTTCCTTAGCTTAAAATACAAAAACATTCGGCTAGCTATCTATTAACTTTCTATTCTAATTAATTAAATTGCGTCATATATTCTATATTTATCTAATTTACATCTTTTGTTGGATTATCTATATGTTTTCTTATCCGTACATCCTTCAATTCACATTAATTATTTCTATTTCTATACTATTAATATTATATCAGAACTTACACACTGGCTTCCTCCAAGGATGCATGCATGTCAAAGATTACAAATGACTGTAATATATTTTATTTCATTTTATTAATTATCAAAATTTTGTCTCTAAGATTAGGTCCTAATTAAGCTTCTAAAAAGTGACACGAAGAGGACTAACTGGACTGAAACAGATACGCTGACGATAGCCAACGTAATTTTTGAAATATTTTGTGGACTATACGTATCTAGAGTTTGAATTATGTTATTATTTATTTATTTATAAAATTCTGATAATATTGTGAAGAAAAACACTGAAACAAGTTAAAACCTTGACATTTTAATTGGTAGGGGAAATCTAACTACCGTACCGACTAATAATTCTTGGTTTGTAGACTTTGATGTAAAGGTCAAAACCATTAGTTACTTGCCACCTGTCTCATCTCATTCATCCAAAATTTCCACATTTTTATTACTGTTCAGATAAAGTCTAAACACTTTTACAGTTGAAAAAAAAAAAGAAGGAATAGTTAGGAGTAATATCCTTTGATCAACTAATTTATCAATACAATAGAAGCATATATTACTTACATAATGAATTTGTATATATGTACGTACATTATAAACTGTACATATCTTATAAAGTAAATTGGTTGATCAAATAATTCAGATTCATAATTATTTTTAAAAAAATATATTATTATTTTTTCGTCCACTTGGATCACCGACTATATAAAAATAATAATTCTTCTGTCTCTATTAACTTGTTTACTTTTTCTTTTTTAATTATTCCTAAAAATAAATGACAAATTAATGAAGGATATTTCTTTTTAAATTGTTCCTAATTATTTGTCCATTTTGACAAATTATGAAAGGATATTTTTTTTTACCTATTATATCCTCAATTAATTACTTAAAAAAAGATAGACCTTTTTGAGAATCTTAAAATTTTAATTAATCCACTTCATAATTATTATGAGTAAAATGATAAACTCACTATGTTAATCATTGTTTTCTTAATAGCTATGTTAATGCAAAAGTGAACAACTAATTAGGAACAGGGGAGTAGAATTTTTTATATTTAAAGAGTGATATAGTTAAATTATCAATCTATTTATTGTACTTTGAGAAATATGCTAAGAAAATATTAAATAAGTAAAAATGATACATTATTTTCAATATTCGATCACCTTAAGTAACTTTTGTACATTTCACTCTCAAGAGACAGCGTAGAAAGTGATTTGAGGCATTGACATACAACGAGGCCGGCGCCAAATACTATTGACTTCAATCTATTTTTCCCATCTATAAATATTGGTCTTCATCCTCTCAAGGTCCTACAAGTTCACTTTTGTTCTCTTAAAAGTTCTTTAAAACACTTAGCAACTTTTTAATAACATCTACAAGGAACAAAAAAACAAAACAAAGAAGCA
